# Supplementary material
Source: PubMed Central journal article supplement (PMC9439587)
Supplement: NIHMS1804216-supplement-Supplemental_Material.pdf [file NIHMS1804216-supplement-Supplemental_Material.pdf]

## Supplemental Materials

### Between-Person Latent Structure

#### *Between-Person Structure with Unrestricted Within-Person Covariance*

Study 1. In a model with unrestricted within-person covariance, model fit statistics continued to improve until a four-factor solution at the between-person level (AIC = 43,935; BIC = 44,552; RMSEA < .001; CFI = 0.97; TLI = 0.90; SRMR-between < .001; SRMR = 0.07). At a five-factor solution, some fit statistics began to worsen by some indices (BIC = 44,605). The first factor in the four-factor solution was characterized by strong positive loadings for self-evaluative thought and analytical self-focus and moderate positive loadings for memory, past-focus, and personal problem content, suggestive of between-person variability in self-referential processing. The second factor was suggestive of an anxious distress factor, and was characterized by high loadings for intrusiveness, uncontrollability, uncertainty, and anxiety, and moderate-to-high loadings for repetitiveness and the other negative affectivity items. The third factor was characterized by significant moderate positive loading for task-orientation and moderate negative loadings for past-focus and sad affect. The final factor was characterized by moderate-to-high positive loadings for positive affect, vague/abstract quality, productiveness, and social relationships, with a moderate negative loading for present-focus, potentially suggestive of extraversion.

After a three three-factor between-person structure was identified as the best-fitting solution in the high-symptom sample (see Study 2 below), we checked the same structure in the Study 1 sample for consistency. Model fit was substantially worse (AIC = 44,003; BIC = 44,527; RMSA < .001; CFI = 0.95; TLI = 0.87; SRMR = 0.10) and the pattern of factor loadings differed in non-trivial ways from the solution identified in Study 2; we therefore do not discuss that solution further.

Study 2. In the clinical sample, four- and five-factor solutions were inadmissible due to Heywood cases. The three-factor solution showed adequate fit (AIC = 46,237; BIC = 46,763; CFI = 0.98; TLI = 0.94; SRMR = 0.08). The first factor included high positive loadings for intrusiveness and uncontrollability, and moderate positive loadings for intrusiveness, uncontrollability, uncertainty, anxious affect, personal problem and task-orientation, and moderate positive loadings for repetitiveness, future focus, and verbal-linguistic style, all of which are suggestive a “worrier” profile, despite the failure of those items to covary at the level of the thought. The second factor included high loadings for past-focus, anger, sadness, memory, and self-referential processing, suggestive of a classically ruminative style. The final factor was characterized by strong positive loadings for productiveness and positive affect, moderate positive loadings for vagueness/abstractness and social/relationship content, and moderate negative loadings for sad affect and present-focus, suggestive of broadly prosocial thought.

#### *Between-Person Structure with Five Within-Person Factors*

Study 1. When we held the within-subject structure constant at five factors, a three-factor between-person solution offered the best fit (AIC = 44,673; BIC = 45,794; RMSA = 0.047; CFI

= 0.88; TLI = 0.82; SRMR between = .120) relative to a one- or two-between-person factor solution. Solutions with four and five between-person factors were inadmissible due to Heywood cases. In the solution with three between-person factors, the first factor included moderate positive loadings for emotion-focused content (“how I’m feeling”), present-focus, and task-orientation, moderate positive loadings for intrusiveness and personal problem content, and a moderate negative loading for abstractness. The second factor included moderate to high negative loadings for the negative affectivity items (including uncertainty) and the three dyscontrol items, suggestive of neuroticism. The third factor included moderate-to-high positive loadings for positive affectivity, productiveness, self-referential processing, social/relationship orientation, and memory, suggestive of warm interpersonal recollections.

Study 2. In the clinical sample, when we held the within-person structure constant at five factors, the single-factor between-person solution (AIC = 46,956; BIC = 47,881; RMSEA = 0.04; CFI = 0.90; TLI = 0.86; SRMR-within = 0.43; SRMR-between = 0.18) was not markedly worse than the two, three, or four-factor (AIC = 46,813; BIC = 48,033; RMSEA = 0.037; CFI = 0.93; TLI = 0.88; SRMR-within = 0.03; SRMR-between = 0.089) between-person solutions. The five-factor between-person solution was not admissible due to a Heywood case.

The solution with a three-factor between-person structure and a five-factor within-person structure had adequate fit (AIC = 46,825; BIC = 47,953; CFI = 0.92; TLI = 0.88; SRMR-within = 0.035; SRMR-between = 0.100). The first factor was characterized by high loadings for uncontrollability, social/relationship content, task and personal problem orientation, and anxious affect. The second factor was characterized by strong positive loadings for past-focus, memory, sad and angry affect, and a moderate loading for present-focus, suggestive of a ruminative tendency. The final factor was characterized by strong positive loadings for productiveness and positive affect, moderate positive loadings for past-focus, social/relationship content, memory, visual properties, and abstractness, and a moderate negative loading for uncertainty, suggestive of positive, interpersonal episodic memories.

**Conclusions:** The present findings offer inconsistent findings that are challenging to interpret both within and across samples. Because the between-person factor structure differed in non-trivial respects dependent on sample and the manner of calculation, and more importantly because present study was not designed nor optimized to detect a between-person thought structure, we do not view the lack of robustness and replicability across samples as a limitation of the findings. By contrast, the present study is grounded in the assertion that the within-person structure of thoughts is of greater theoretical and clinical importance compared to a between-person structure. Nevertheless, future work that is optimized to detect this structure at both levels could shed valuable light on the potential implications of different patterns of covariance among features at the person- versus thought-level for theory and perhaps intervention and prevention.

### **Sensitivity Analyses with Additional Items**

Inspection of the additional features revealed a high correlation between Embarrassed and Ashamed,  $r(276) = .89, p < .001$  and Disgusted,  $r(276) = .64, p < .001$ ; these items were averaged to create a Shame composite. To examine the extent to which the inclusion of these

features might impact the dimensional structure, we repeated the analyses as described above but with the addition of the new items (i.e., shame; egosyntonicity; acceptability; realisticness; urge or impulse).

The full multilevel exploratory factor analysis failed to converge, but removing the urge/impulse item resolved this issue. Broadly, the findings were mostly unchanged. Model fit remained acceptable for the five-factor within/three-factor between person solution (CFI = .90; SRMR-within = 0.041; RMSEA = 0.037; AIC = 54,610; BIC = 55,943). Dyscontrol emerged as the first factor with no notable difference in the loading patterns. Self-focus was also similar with a moderate positive loading for egosyntonicity. The interpersonal and uncertainty factors were largely unchanged, as was the valence dimension, except for an expected positive loading for shame and a negative loading for acceptability. Given the similarity to the main results, we did not repeat the correlation or regression analyses.

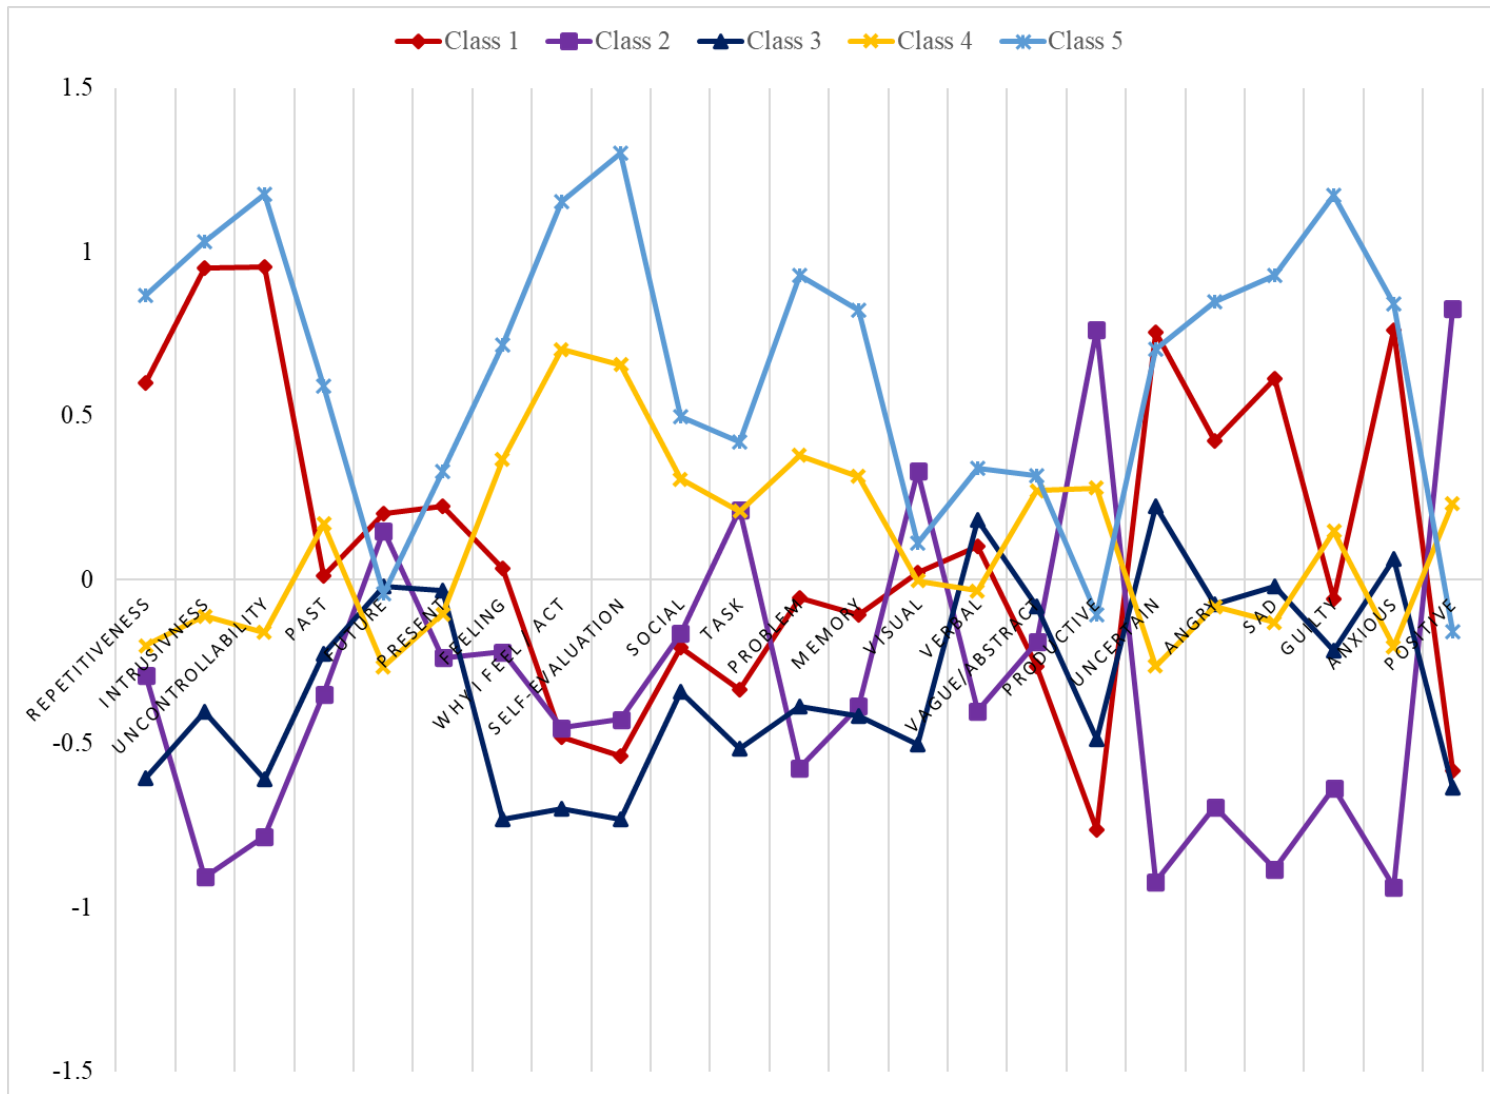

Figure S1. Five latent class solution for Study 1. Values are presented as standardized ratings across items or composites.

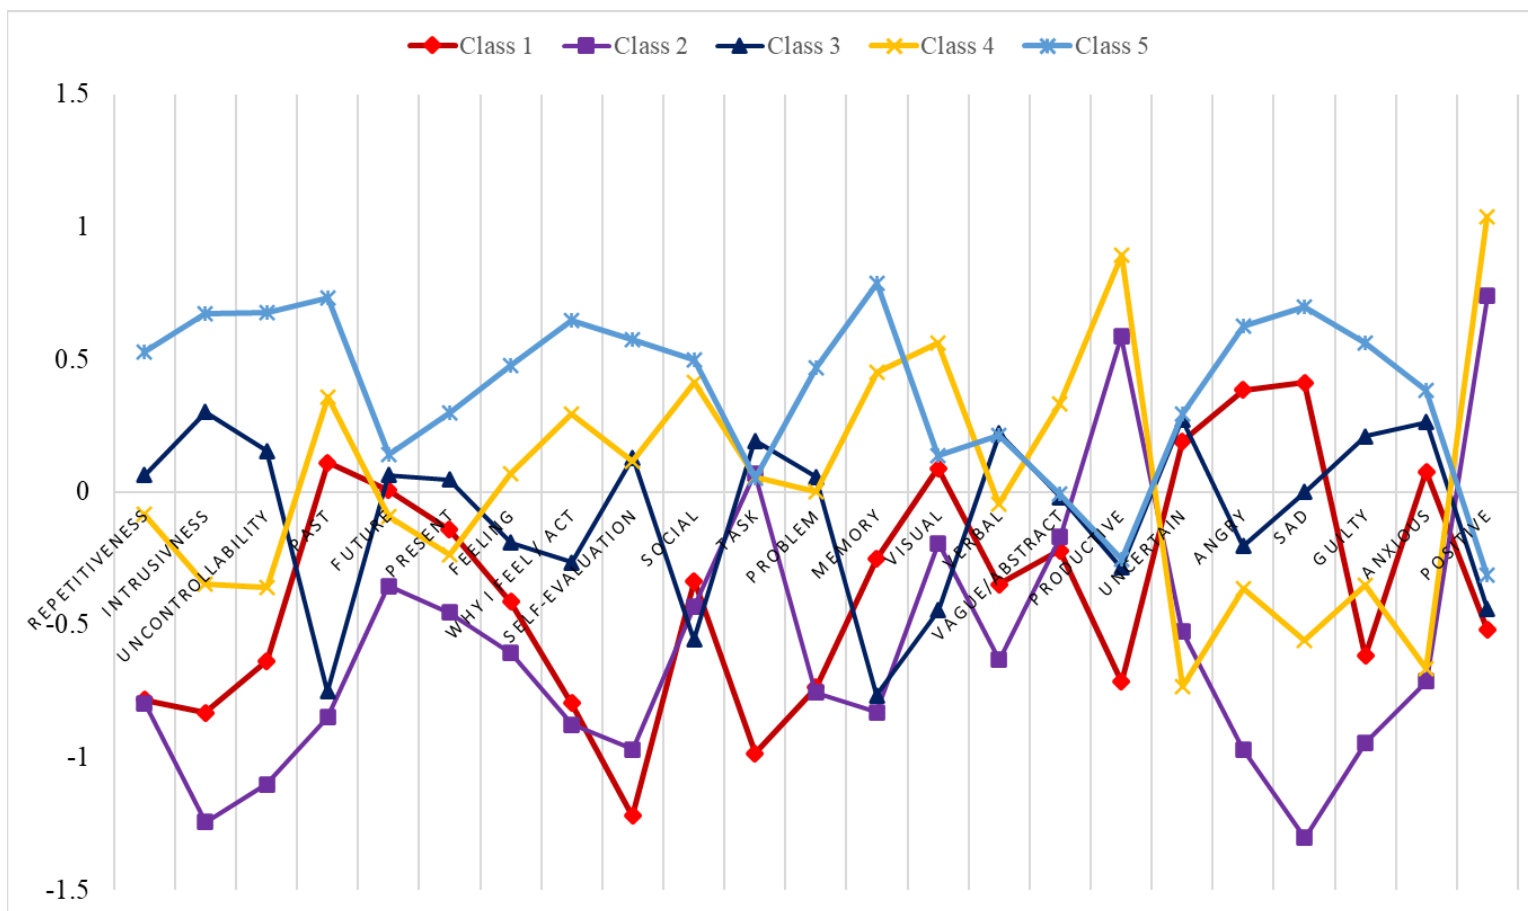

Figure S2. Five latent class solution for Study 2. Values are presented as standardized ratings across items or composites.

Supplemental Table 1

*Pearson Correlations Between Empirically-Derived Dimensions and Established Trait PT Measures in Studies 1 and 2*

|                                | PTQ     | PSWQ   | RRS-<br>Brood | RRS-<br>Reflect | RRQ-<br>Rum | YBOC<br>S-SR | PCL-<br>C-REx | PEPQ-<br>R <sup>a</sup> | RPA<br>Self <sup>a</sup> | RPA<br>Emo <sup>a</sup> | DASS-<br>Anx | DASS-<br>Str | DASS-<br>Dep | YBOC<br>S-SR | PCL-C  | LSAS |
|--------------------------------|---------|--------|---------------|-----------------|-------------|--------------|---------------|-------------------------|--------------------------|-------------------------|--------------|--------------|--------------|--------------|--------|------|
|                                | Obs     |        |               |                 |             |              |               |                         |                          |                         |              |              |              |              |        |      |
|                                | Study 1 |        |               |                 |             |              |               |                         |                          |                         |              |              |              |              |        |      |
| Empirically-Derived Dimensions |         |        |               |                 |             |              |               |                         |                          |                         |              |              |              |              |        |      |
| 1.Dyscontrol                   | 0.52**  | 0.42** | 0.40**        | 0.21**          | 0.36**      | 0.36**       | 0.52**        | ---                     | ---                      | ---                     | 0.37**       | 0.50**       | 0.39**       | 0.36**       | 0.52** | ---  |
| 2 Self-Focus                   | 0.21**  | 0.14*  | 0.24**        | 0.16*           | 0.18*       | 0.22**       | 0.31**        | ---                     | ---                      | ---                     | 0.24**       | 0.25**       | 0.25**       | 0.21**       | 0.30** | ---  |
| 3. Inter-<br>personal          | 0.19*   | 0.02   | 0.22**        | 0.13*           | 0.09        | 0.28**       | 0.39**        | ---                     | ---                      | ---                     | 0.31**       | 0.28**       | 0.24**       | 0.27**       | 0.34** | ---  |
| 4.Valence                      | 0.47**  | 0.43** | 0.39**        | 0.18*           | 0.38**      | 0.34**       | 0.37**        | ---                     | ---                      | ---                     | 0.33**       | 0.43**       | 0.45**       | 0.33**       | 0.43** | ---  |
| 5.Uncertainty                  | 0.40**  | 0.39** | 0.35**        | 0.20**          | 0.30**      | 0.25**       | 0.34**        | ---                     | ---                      | ---                     | 0.32**       | 0.39**       | 0.31**       | 0.25**       | 0.38** | ---  |

---

Conventional Perseverative Thought Self-Report Measures

|             |     |        |        |        |        |        |        |     |     |     |        |        |        |        |        |     |
|-------------|-----|--------|--------|--------|--------|--------|--------|-----|-----|-----|--------|--------|--------|--------|--------|-----|
| 6. PTQ      | --- | 0.72** | 0.71** | 0.40** | 0.75** | 0.56** | 0.56** | --- | --- | --- | 0.53** | 0.72** | 0.66** | 0.55** | 0.59** | --- |
| 7. PSWQ     | --- | ---    | 0.64** | 0.28** | 0.75** | 0.48** | 0.47** | --- | --- | --- | 0.45** | 0.65** | 0.54** | 0.46** | 0.54** | --- |
| 8. RRS-     |     |        |        |        |        |        |        |     |     |     |        |        |        |        |        |     |
| Brooding    | --- | ---    | ---    | 0.46** | 0.71** | 0.50** | 0.56** | --- | --- | --- | 0.56** | 0.71** | 0.61** | 0.46** | 0.61** | --- |
| 9. RRS-     |     |        |        |        |        |        |        |     |     |     |        |        |        |        |        |     |
| Reflect     | --- | ---    | ---    | ---    | 0.35** | 0.34** | 0.39** | --- | --- | --- | 0.36** | 0.40** | 0.36** | 0.34** | 0.42** | --- |
| 10. RRQ-    |     |        |        |        |        |        |        |     |     |     |        |        |        |        |        |     |
| Ruminate    | --- | ---    | ---    | ---    | ---    | 0.47** | 0.47** | --- | --- | --- | 0.41** | 0.59** | 0.57** | 0.46** | 0.52** | --- |
| 12. Y-BOCS- |     |        |        |        |        |        |        |     |     |     |        |        |        |        |        |     |
| SR Obs      | --- | ---    | ---    | ---    | ---    | ---    | 0.51** | --- | --- | --- | 0.52** | 0.60** | 0.48** | 0.91** | 0.53** | --- |
| 13. PCL-C   |     |        |        |        |        |        |        |     |     |     |        |        |        |        |        |     |
| REx         | --- | ---    | ---    | ---    | ---    | ---    | ---    | --- | --- | --- | 0.71** | 0.69** | 0.61** | 0.52** | 0.93** | --- |

---

Conventional Symptom Self-Report Measures

17. DASS-

Anxiety 0.53\*\* 0.45\*\* 0.56\*\* 0.36\*\* 0.41\*\* 0.52\*\* 0.71\*\* --- --- --- --- 0.73\*\* 0.68\*\* 0.54\*\* 0.75\*\* ---

18. DASS-

Stress 0.72\*\* 0.65\*\* 0.71\*\* 0.40\*\* 0.59\*\* 0.60\*\* 0.69\*\* --- --- --- --- --- 0.75\*\* 0.59\*\* 0.76\*\* ---

19. DASS-

Dep 0.66\*\* 0.54\*\* 0.61\*\* 0.36\*\* 0.57\*\* 0.48\*\* 0.61\*\* --- --- --- --- --- --- 0.47\*\* 0.72\*\* ---

20. Y-BOCS-

SR 0.55\*\* 0.46\*\* 0.46\*\* 0.34\*\* 0.46\*\* 0.91\*\* 0.52\*\* --- --- --- --- --- --- --- 0.54\*\* ---

21. PCL-C

0.59\*\* 0.54\*\* 0.61\*\* 0.42\*\* 0.52\*\* 0.53\*\* 0.93\*\* --- --- --- --- --- --- --- ---

Study 2

Empirically-Derived Dimensions

1. Dyscontrol

0.56\*\* 0.42\*\* 0.35\*\* 0.09 0.44\*\* 0.53\*\* 0.49\*\* 0.37\*\* -0.17\* -0.21\* 0.44\*\* 0.50\*\* 0.30\*\* 0.49\*\* 0.54\*\* 0.38\*\*

2. Self-Focus

0.31\*\* 0.19\* 0.34\*\* 0.18\* 0.32\*\* 0.32\*\* 0.42\*\* 0.26\*\* -0.04 -0.09 0.35\*\* 0.28\*\* 0.23\*\* 0.29\*\* 0.46\*\* 0.14\*



|                |        |        |        |      |        |        |        |        |         |         |        |        |        |        |        |        |
|----------------|--------|--------|--------|------|--------|--------|--------|--------|---------|---------|--------|--------|--------|--------|--------|--------|
| 3. Inter-      |        |        |        |      |        |        |        |        |         |         |        |        |        |        |        |        |
| personal       | 0.24** | 0.13*  | 0.28** | 0.11 | 0.17*  | 0.37** | 0.48** | 0.32** | 0.03    | -0.07   | 0.41** | 0.23** | 0.24** | 0.40** | 0.52** | 0.33** |
| 4. Valence     |        |        |        |      |        |        |        |        |         |         |        |        |        |        |        |        |
|                | 0.34** | 0.29** | 0.31** | 0.04 | 0.38** | 0.27** | 0.28** | 0.24** | -0.30** | -0.28** | 0.27** | 0.28** | 0.39** | 0.22** | 0.37** | 0.23** |
| 5. Uncertainty |        |        |        |      |        |        |        |        |         |         |        |        |        |        |        |        |
|                | 0.33** | 0.28** | 0.21*  | 0.05 | 0.35** | 0.12   | 0.14*  | 0.12   | -0.22** | -0.14*  | 0.13*  | 0.20*  | 0.15*  | 0.08   | 0.20*  | 0.16*  |

---

Conventional Perseverative Thought Self-Report Measures

|          |     |        |        |        |        |        |        |        |         |         |        |        |        |        |        |        |
|----------|-----|--------|--------|--------|--------|--------|--------|--------|---------|---------|--------|--------|--------|--------|--------|--------|
| 6. PTQ   |     |        |        |        |        |        |        |        |         |         |        |        |        |        |        |        |
|          | --- | 0.63** | 0.57** | 0.22** | 0.64** | 0.54** | 0.50** | 0.48** | -0.18*  | -0.28** | 0.38** | 0.60** | 0.47** | 0.49** | 0.53** | 0.32** |
| 7. PSWQ  |     |        |        |        |        |        |        |        |         |         |        |        |        |        |        |        |
|          | --- | ---    | 0.48** | 0.05   | 0.55** | 0.42** | 0.32** | 0.46** | -0.21*  | -0.17*  | 0.38** | 0.51** | 0.28** | 0.38** | 0.37** | 0.34** |
| 8. RRS-  |     |        |        |        |        |        |        |        |         |         |        |        |        |        |        |        |
| Brood    | --- | ---    | ---    | 0.39** | 0.52** | 0.34** | 0.36** | 0.28** | -0.12   | -0.14*  | 0.37** | 0.46** | 0.41** | 0.31** | 0.46** | 0.27** |
| 9. RRS-  |     |        |        |        |        |        |        |        |         |         |        |        |        |        |        |        |
| Reflect  | --- | ---    | ---    | ---    | 0.18*  | 0.09   | 0.13*  | 0.1    | 0.04    | 0.05    | 0.19*  | 0.16*  | 0.17*  | 0.09   | 0.20*  | 0.11   |
| 10. RRQ- |     |        |        |        |        |        |        |        |         |         |        |        |        |        |        |        |
| Ruminate | --- | ---    | ---    | ---    | ---    | 0.31** | 0.32** | 0.38** | -0.29** | -0.28** | 0.21** | 0.38** | 0.33** | 0.25** | 0.35** | 0.20*  |

12. Y-BOCS-

SR Obs      ---      ---      ---      ---      ---      ---      0.51\*\*   0.42\*\*   -0.03   -0.14\*   0.55\*\*   0.48\*\*   0.31\*\*   0.90\*\*   0.54\*\*   0.42\*\*

13. PCL-C

REx      ---      ---      ---      ---      ---      ---      ---      0.34\*\*   0      -0.13\*   0.55\*\*   0.44\*\*   0.32\*\*   0.48\*\*   0.84\*\*   0.39\*\*

14. PEPQ-R

---      ---      ---      ---      ---      ---      ---      ---      -0.05   -0.13   0.42\*\*   0.43\*\*   0.42\*\*   0.42\*\*   0.43\*\*   0.44\*\*

15. RPA Self

---      ---      ---      ---      ---      ---      ---      ---      ---      0.36\*\*   -0.03   -0.09   0.27\*\*   0.06   -0.08   -0.05

16. RPA Emo

---      ---      ---      ---      ---      ---      ---      ---      ---      ---      0      -0.17\*   0.42\*\*   -0.1   0.22\*\*   -0.16\*

Conventional Symptom Self-Report Measures

17. DASS-

Anxiety      0.38\*\*   0.38\*\*   0.37\*\*   0.19\*   0.21\*\*   0.55\*\*   0.55\*\*   0.42\*\*   -0.03   0      ---      0.58\*\*   0.39\*\*   0.55\*\*   0.64\*\*   0.44\*\*

18. DASS-

Stress      0.60\*\*   0.51\*\*   0.46\*\*   0.16\*   0.38\*\*   0.48\*\*   0.44\*\*   0.43\*\*   -0.09   -0.17\*   ---      ---      0.48\*\*   0.47\*\*   0.55\*\*   0.32\*\*

19. DASS-

Dep      0.47\*\*   0.28\*\*   0.41\*\*   0.17\*   0.33\*\*   0.31\*\*   0.32\*\*   0.42\*\*   -0.27\*\*   -0.42\*\*   ---      ---      ---      0.28\*\*   0.54\*\*   0.38\*\*

|               |        |        |        |       |        |        |        |        |       |         |     |     |     |     |        |        |
|---------------|--------|--------|--------|-------|--------|--------|--------|--------|-------|---------|-----|-----|-----|-----|--------|--------|
| 20. Y-BOCS-SR | 0.49** | 0.38** | 0.31** | 0.09  | 0.25** | 0.90** | 0.48** | 0.42** | 0.06  | -0.1    | --- | --- | --- | --- | 0.52** | 0.43** |
| 21. PCL-C     | 0.53** | 0.37** | 0.46** | 0.20* | 0.35** | 0.54** | 0.84** | 0.43** | -0.08 | -0.22** | --- | --- | --- | --- | ---    | 0.55** |
| 22. LSAS      | 0.32** | 0.34** | 0.27** | 0.11  | 0.20*  | 0.42** | 0.39** | 0.44** | -0.05 | -0.16*  | --- | --- | --- | --- | ---    | ---    |

---

*Note.* PTQ = Perseverative Thought Questionnaire; PSWQ = Penn State Worry Questionnaire; RRS-Brood = Brooding subscale of the Rumination Response Scale 10-item; RRS-Reflect = Reflection subscale of the Rumination Response Scale 10-item; RRQ-Rum = Rumination subscale of the Rumination-Reflection Questionnaire; Y-BOCS-SR = Yale-Brown Obsessive-Compulsive Scale-Self Report; Y-BOCS-SR Obs = Obsessions subscale of the Yale-Brown Obsessive-Compulsive Scale-Self Report; PCL-C = Post-Traumatic Stress Checklist-Civilian Version; PCL-C REX = Re-Experiencing subscale of the Post-Traumatic Stress Checklist-Civilian Version; PEPQ-R = Post-Event Processing Questionnaire-Revised; RPA Self = Self-Focus subscale of the Responses to Positive Affect Questionnaire; RPA Emo = Emotion-Focus subscale of the Responses to Positive Affect; DASS = Depression, Anxiety, and Stress Scale-21 item; DASS Anxiety = Anxiety subscale of the Depression, Anxiety, and Stress Scale-21 item; DASS Dep = Depression subscale of the Depression, Anxiety, and Stress Scale-21 item; DASS Stress = Stress subscale of the Depression, Anxiety, and Stress Scale-21 item; LSAS = Liebowitz Social Anxiety Scale.

<sup>a</sup>Not administered in Study 1.

\* =  $p < .05$ . \*\* =  $p < .001$ .

Supplemental Table 2

*Incremental Prediction of Trait PT Measures by Empirically-Derived Dimension Scores*

| Outcome and predictor dimensions     | Study 1  |               |         |       |              | Study 2  |               |         |       |              |
|--------------------------------------|----------|---------------|---------|-------|--------------|----------|---------------|---------|-------|--------------|
|                                      | <i>B</i> | <i>SE (B)</i> | $\beta$ | $R^2$ | $\Delta R^2$ | <i>B</i> | <i>SE (B)</i> | $\beta$ | $R^2$ | $\Delta R^2$ |
| Perseverative Thinking Questionnaire |          |               |         | 0.33  | 0.33**       |          |               |         | 0.33  | 0.33**       |
| Factor 1: Dyscontrol                 | 1.83**   | 0.34          | 0.37    |       |              | 2.22**   | 0.31          | 0.50    |       |              |
| Factor 2: Self-Focus                 | 0.17     | 0.20          | 0.05    |       |              | -0.01    | 0.23          | 0.00    |       |              |
| Factor 3: Interpersonal              | 0.06     | 0.28          | 0.01    |       |              | 0.04     | 0.26          | 0.01    |       |              |
| Factor 4: Valence                    | 1.10**   | 0.25          | 0.31    |       |              | 0.15     | 0.19          | 0.05    |       |              |
| Factor 5: Uncertainty                | -0.34    | 0.50          | -0.05   |       |              | 0.52     | 0.38          | 0.09    |       |              |
| Penn State Worry Questionnaire       |          |               |         | 0.26  | 0.26**       |          |               |         | 0.20  | 0.20**       |
| Factor 1: Dyscontrol                 | 1.94**   | 0.50          | 0.28    |       |              | 2.01**   | 0.42          | 0.37    |       |              |
| Factor 2: Self-Focus                 | 0.29     | 0.31          | 0.06    |       |              | -0.25    | 0.32          | -0.06   |       |              |
| Factor 3: Interpersonal              | -1.02*   | 0.42          | -0.14   |       |              | -0.11    | 0.34          | -0.02   |       |              |
| Factor 4: Valence                    | 1.54**   | 0.38          | 0.30    |       |              | 0.31     | 0.25          | 0.09    |       |              |
| Factor 5: Uncertainty                | 0.15     | 0.74          | 0.02    |       |              | 0.74     | 0.51          | 0.11    |       |              |

|                         |        |      |       |      |        |        |      |       |        |
|-------------------------|--------|------|-------|------|--------|--------|------|-------|--------|
| RRS Brooding            |        |      |       | 0.23 | 0.23** |        |      | 0.18  | 0.18** |
| Factor 1: Dyscontrol    | 0.27*  | 0.10 | 0.19  |      |        | 0.24*  | 0.11 | 0.16  |        |
| Factor 2: Self-Focus    | 0.11†  | 0.06 | 0.11  |      |        | 0.16†  | 0.09 | 0.14  |        |
| Factor 3: Interpersonal | 0.11   | 0.08 | 0.08  |      |        | 0.12   | 0.10 | 0.09  |        |
| Factor 4: Valence       | 0.24** | 0.08 | 0.23  |      |        | 0.14*  | 0.07 | 0.15  |        |
| Factor 5: Uncertainty   | 0.09   | 0.15 | 0.05  |      |        | 0.03   | 0.14 | 0.01  |        |
| RRS Reflection          |        |      |       | 0.07 | 0.07** |        |      | 0.03  | 0.03   |
| Factor 1: Dyscontrol    | 0.08   | 0.10 | 0.06  |      |        | 0.04   | 0.11 | 0.03  |        |
| Factor 2: Self-Focus    | 0.09   | 0.06 | 0.09  |      |        | 0.18*  | 0.09 | 0.18  |        |
| Factor 3: Interpersonal | 0.09   | 0.09 | 0.06  |      |        | 0.02   | 0.09 | 0.02  |        |
| Factor 4: Valence       | 0.05   | 0.08 | 0.05  |      |        | -0.04  | 0.07 | -0.05 |        |
| Factor 5: Uncertainty   | 0.18   | 0.15 | 0.1   |      |        | -0.03  | 0.14 | -0.01 |        |
| RRQ Rumination          |        |      |       | 0.19 | 0.19** |        |      | 0.24  | 0.24** |
| Factor 1: Dyscontrol    | 1.08** | 0.37 | 0.22  |      |        | 0.96** | 0.26 | 0.27  |        |
| Factor 2: Self-Focus    | 0.40†  | 0.23 | 0.11  |      |        | 0.25   | 0.20 | 0.10  |        |
| Factor 3: Interpersonal | -0.38  | 0.31 | -0.07 |      |        | -0.18  | 0.21 | -0.06 |        |

|                         |        |      |       |      |        |        |      |       |      |        |
|-------------------------|--------|------|-------|------|--------|--------|------|-------|------|--------|
| Factor 4: Valence       | 1.12** | 0.28 | 0.31  |      |        | 0.37*  | 0.16 | 0.16  |      |        |
| Factor 5: Uncertainty   | -0.39  | 0.55 | -0.06 |      |        | 0.55†  | 0.31 | 0.12  |      |        |
| Y-BOCS-SR Obsessions    |        |      |       | 0.20 | 0.20** |        |      |       | 0.32 | 0.32** |
| Factor 1: Dyscontrol    | 0.36*  | 0.13 | 0.21  |      |        | 1.00** | 0.14 | 0.50  |      |        |
| Factor 2: Self-Focus    | 0.11   | 0.08 | 0.09  |      |        | 0.04   | 0.11 | 0.03  |      |        |
| Factor 3: Interpersonal | 0.26*  | 0.11 | 0.15  |      |        | 0.26*  | 0.12 | 0.15  |      |        |
| Factor 4: Valence       | 0.3**  | 0.10 | 0.24  |      |        | 0.03   | 0.08 | 0.03  |      |        |
| Factor 5: Uncertainty   | -0.16  | 0.19 | -0.07 |      |        | -0.38* | 0.17 | -0.14 |      |        |
| PCL-C Re-Experiencing   |        |      |       | 0.35 | 0.35** |        |      |       | 0.34 | 0.34** |
| Factor 1: Dyscontrol    | 0.59** | 0.11 | 0.36  |      |        | 0.74** | 0.15 | 0.35  |      |        |
| Factor 2: Self-Focus    | 0.12†  | 0.07 | 0.09  |      |        | 0.19†  | 0.11 | 0.12  |      |        |
| Factor 3: Interpersonal | 0.39** | 0.09 | 0.23  |      |        | 0.49** | 0.12 | 0.27  |      |        |
| Factor 4: Valence       | 0.17*  | 0.08 | 0.15  |      |        | 0.03   | 0.09 | 0.02  |      |        |
| Factor 5: Uncertainty   | -0.05  | 0.17 | -0.02 |      |        | -0.28  | 0.18 | -0.10 |      |        |

*Note.* RRS = Ruminative Response Scale 10-item; RRQ = Rumination-Reflection Questionnaire; Y-BOCS-SR = Yale-Brown

Obsessive Compulsive Scale-Self Report; PCL-C = Post-Traumatic Disorder Checklist-Civilian Version.

† =  $p < .10$ . \* =  $p < .05$ . \*\* =  $p < .001$ .

Supplemental Table 3

*Study 2 Self-Reported Diagnoses*

| Disorder                                     | Frequency | %   |
|----------------------------------------------|-----------|-----|
| Generalized anxiety disorder                 | 168       | 61% |
| Major depressive disorder                    | 122       | 44% |
| Social anxiety disorder                      | 63        | 22% |
| Post-traumatic stress disorder               | 44        | 16% |
| Obsessive-compulsive disorder                | 41        | 15% |
| Other anxiety disorders                      | 64        | 23% |
| Other obsessive-compulsive related disorders | 48        | 17% |
| Personality disorders                        | 29        | 10% |
| Other disorders                              | 131       | 47% |

*Note.* Diagnostic categories are not mutually exclusive.

Supplemental Table 4

*Incremental Prediction of Secondary Trait PT Measures by Empirically-Derived Dimensions for Study 2*

| Outcome and predictor dimensions | <i>B</i> | <i>SE (B)</i> | $\beta$ | $R^2$ | $\Delta R^2$ |
|----------------------------------|----------|---------------|---------|-------|--------------|
| PEPQ-R                           |          |               |         | 0.18  | 0.18**       |
| Factor 1: Dyscontrol             | 3.05**   | 0.93          | 0.28    |       |              |
| Factor 2: Self-Focus             | -0.01    | 0.73          | 0.00    |       |              |
| Factor 3: Interpersonal          | 1.88*    | 0.75          | 0.20    |       |              |
| Factor 4: Valence                | 0.43     | 0.57          | 0.06    |       |              |
| Factor 5: Uncertainty            | -0.62    | 1.18          | -0.04   |       |              |
| PCQ-LC                           |          |               |         | 0.32  | 0.32**       |
| Factor 1: Dyscontrol             | 1.06**   | 0.17          | 0.46    |       |              |
| Factor 2: Self-Focus             | -0.02    | 0.13          | -0.01   |       |              |
| Factor 3: Interpersonal          | 0.21     | 0.14          | 0.11    |       |              |



---

|                         |        |      |       |      |        |
|-------------------------|--------|------|-------|------|--------|
| Factor 4: Valence       | 0.10   | 0.10 | 0.07  |      |        |
| Factor 5: Uncertainty   | 0.13   | 0.20 | 0.04  |      |        |
| PCQ-PF                  |        |      |       | 0.21 | 0.21** |
| Factor 1: Dyscontrol    | 1.35** | 0.26 | 0.40  |      |        |
| Factor 2: Self-Focus    | 0.03   | 0.20 | 0.01  |      |        |
| Factor 3: Interpersonal | 0.41†  | 0.21 | 0.14  |      |        |
| Factor 4: Valence       | -0.03  | 0.15 | -0.01 |      |        |
| Factor 5: Uncertainty   | -0.30  | 0.31 | -0.07 |      |        |
| PCQ-EW                  |        |      |       | 0.24 | 0.24** |
| Factor 1: Dyscontrol    | 0.74** | 0.18 | 0.31  |      |        |
| Factor 2: Self-Focus    | 0.00   | 0.14 | 0.00  |      |        |
| Factor 3: Interpersonal | 0.17   | 0.15 | 0.09  |      |        |
| Factor 4: Valence       | 0.38** | 0.11 | 0.25  |      |        |

---

---

|                         |        |      |       |      |        |
|-------------------------|--------|------|-------|------|--------|
| Factor 5: Uncertainty   | -0.33  | 0.22 | -0.11 |      |        |
| PCQ-SC                  |        |      |       | 0.09 | 0.09** |
| Factor 1: Dyscontrol    | -0.08  | 0.17 | -0.04 |      |        |
| Factor 2: Self-Focus    | 0.30*  | 0.13 | 0.20  |      |        |
| Factor 3: Interpersonal | 0.19   | 0.14 | 0.11  |      |        |
| Factor 4: Valence       | -0.01  | 0.10 | -0.01 |      |        |
| Factor 5: Uncertainty   | 0.29   | 0.21 | 0.11  |      |        |
| PCQ-DP                  |        |      |       | 0.27 | 0.27** |
| Factor 1: Dyscontrol    | 2.13** | 0.44 | 0.35  |      |        |
| Factor 2: Self-Focus    | 0.30   | 0.34 | 0.07  |      |        |
| Factor 3: Interpersonal | 0.68†  | 0.36 | 0.13  |      |        |
| Factor 4: Valence       | 0.28   | 0.26 | 0.07  |      |        |
| Factor 5: Uncertainty   | 0.19   | 0.54 | 0.03  |      |        |

---

|                         |         |      |       |      |        |
|-------------------------|---------|------|-------|------|--------|
| PCQ-DT                  |         |      |       | 0.23 | 0.23** |
| Factor 1: Dyscontrol    | 1.99**  | 0.43 | 0.35  |      |        |
| Factor 2: Self-Focus    | 0.50    | 0.33 | 0.12  |      |        |
| Factor 3: Interpersonal | 0.81*   | 0.35 | 0.17  |      |        |
| Factor 4: Valence       | -0.06   | 0.25 | -0.02 |      |        |
| Factor 5: Uncertainty   | -0.97†  | 0.52 | -0.13 |      |        |
| RPA Self-Focus          |         |      |       | 0.12 | 0.12** |
| Factor 1: Dyscontrol    | -0.04   | 0.05 | -0.06 |      |        |
| Factor 2: Self-Focus    | 0.05    | 0.04 | 0.10  |      |        |
| Factor 3: Interpersonal | 0.05    | 0.04 | 0.09  |      |        |
| Factor 4: Valence       | -0.12** | 0.03 | -0.28 |      |        |
| Factor 5: Uncertainty   | -0.11†  | 0.07 | -0.13 |      |        |
| RPA Emotion-Focus       |         |      |       | 0.09 | 0.09** |

|                         |         |      |       |
|-------------------------|---------|------|-------|
| Factor 1: Dyscontrol    | -0.08   | 0.06 | -0.12 |
| Factor 2: Self-Focus    | 0.03    | 0.04 | 0.05  |
| Factor 3: Interpersonal | 0.02    | 0.05 | 0.03  |
| Factor 4: Valence       | -0.11** | 0.03 | -0.25 |
| Factor 5: Uncertainty   | 0.00    | 0.07 | 0.00  |

*Note.* PEPQ-R = Post-Event Processing Questionnaire-Revised; PCQ-LC = Lack of Controllability subscale of the Perseverative Cognitions Questionnaire; PCQ-PF = Preparing for the Future subscale of the Perseverative Cognitions Questionnaire; PCQ-EW = Expecting the Worst subscale of the Perseverative Cognitions Questionnaire; PCQ-SC = Searching for Causes/Meaning subscale of the Perseverative Cognitions Questionnaire; PCQ-DP = Dwelling on the Past subscale of the Perseverative Cognitions Questionnaire; PCQ-DT = Thinking Discordant with Ideal Self subscale of the Perseverative Cognitions Questionnaire; RPA Self-Focus = Self-Focus subscale of the Responses to Positive Affect Questionnaire; RPA Emotion-Focus = Emotion-Focus subscale of the Responses to Positive Affect Questionnaire.

† =  $p < .10$ . \* =  $p < .05$ . \*\* =  $p < .001$ .
